# Supplementary material
Source: Springer Nature journal article supplement (https://www.springermedizin.de/resource/supplementary/12865_2010_342_MOESM10_ESM.pdf/9427792)

## A. ApoB/IgM

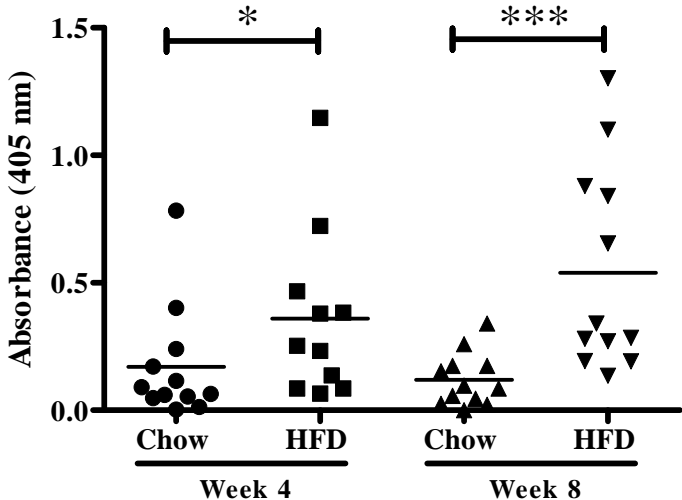

## B. ApoB/IgG

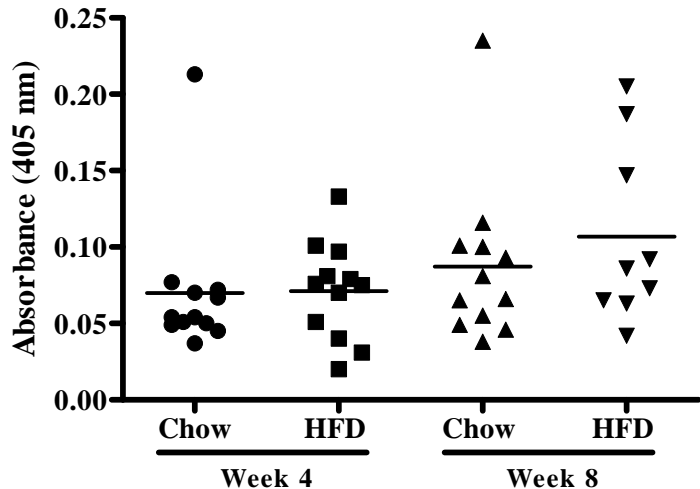

Supplement: MOESM10 [file 9427792]
